# Supplementary material for: Algorithmic Opacity in Opioid Risk Scoring and the Need for Transparent AI Regulation
Source: Research Square preprint supplement (doi:10.21203/rs.3.rs-7368491/v2), 2026-01-19
Supplement: Supplementary file [file c0005c1974b399c6cab3a788.pdf]

**Supplementary Table 1 Comparison of NarxCare® Baseline Predictive Features with Reconstructed Feature Sets in the CURES and IQVIA Datasets**

| Feature Name                | Category  | Description                                                                                                                                                                                                                                                                                                                                                                                                                                                                                                                                                                                                                                                                      |
|-----------------------------|-----------|----------------------------------------------------------------------------------------------------------------------------------------------------------------------------------------------------------------------------------------------------------------------------------------------------------------------------------------------------------------------------------------------------------------------------------------------------------------------------------------------------------------------------------------------------------------------------------------------------------------------------------------------------------------------------------|
| <b>Narxcare (baseline)</b>  |           | Total Morphine Milligram Equivalent (MMEs) prescribed during the most recent 365 days<br>Number of pharmacies where narcotics and/or sedatives were filled in the last 2 years<br>Total MMEs prescribed during in the last 2 years<br>Controlled substance prescriptions with daily MMEs >120 in the last 2 years<br>Number of prescribers where narcotics were obtained in the last 2 years<br>Total dosage (milligrams) of sedatives prescribed for 1 or more years prior to the current date;<br>Total MMEs prescribed for 1 or more years prior to the current date (including MMEs from MOUDs)<br>Number of prescribers where narcotics were obtained in the last 180 days. |
| <b>CURES dataset</b>        |           |                                                                                                                                                                                                                                                                                                                                                                                                                                                                                                                                                                                                                                                                                  |
| MMEs_under_two_years        | Numerical | Total morphine milligram equivalents (MME) prescribed in the last two years.                                                                                                                                                                                                                                                                                                                                                                                                                                                                                                                                                                                                     |
| MMEs_under_one_year         | Numerical | Total MME prescribed in the last year.                                                                                                                                                                                                                                                                                                                                                                                                                                                                                                                                                                                                                                           |
| MMEs_over_one_year          | Numerical | Total MME prescribed more than one year ago.                                                                                                                                                                                                                                                                                                                                                                                                                                                                                                                                                                                                                                     |
| daily_mme_count_above_120   | Numerical | Number of days with daily MME exceeding 120.                                                                                                                                                                                                                                                                                                                                                                                                                                                                                                                                                                                                                                     |
| pharmacies_under_two_years  | Numerical | Number of different pharmacies visited in the past two years.                                                                                                                                                                                                                                                                                                                                                                                                                                                                                                                                                                                                                    |
| prescribers_under_two_years | Numerical | Number of prescribers visited in the past two years.                                                                                                                                                                                                                                                                                                                                                                                                                                                                                                                                                                                                                             |
| prescribers_under_half_year | Numerical | Number of prescribers visited in the past 6 months.                                                                                                                                                                                                                                                                                                                                                                                                                                                                                                                                                                                                                              |
| patient_age                 | Numerical | Age of the patient.                                                                                                                                                                                                                                                                                                                                                                                                                                                                                                                                                                                                                                                              |
| age_median                  | Numerical | Median age of residents in the patient's ZIP code.                                                                                                                                                                                                                                                                                                                                                                                                                                                                                                                                                                                                                               |
| income_household_median     | Numerical | Median household income in the patient's ZIP code.                                                                                                                                                                                                                                                                                                                                                                                                                                                                                                                                                                                                                               |
| home_ownership              | Numerical | Percentage of homeowners in the patient's ZIP code.                                                                                                                                                                                                                                                                                                                                                                                                                                                                                                                                                                                                                              |
| education_highschool        | Numerical | Percentage of individuals with at least high school education in the patient's ZIP code.                                                                                                                                                                                                                                                                                                                                                                                                                                                                                                                                                                                         |
| education_college_or_above  | Numerical | Percentage of individuals with a college degree or higher in the patient's ZIP code.                                                                                                                                                                                                                                                                                                                                                                                                                                                                                                                                                                                             |
| unemployment_rate           | Numerical | Unemployment rate in the patient's ZIP code.                                                                                                                                                                                                                                                                                                                                                                                                                                                                                                                                                                                                                                     |
| poverty                     | Numerical | Percentage of individuals below the poverty line in the patient's ZIP code.                                                                                                                                                                                                                                                                                                                                                                                                                                                                                                                                                                                                      |
| disabled                    | Numerical | Percentage of disabled individuals in the patient's ZIP code.                                                                                                                                                                                                                                                                                                                                                                                                                                                                                                                                                                                                                    |

|                |                  |                                                                         |
|----------------|------------------|-------------------------------------------------------------------------|
| race_white     | Numerical        | Percentage of White individuals in the patient's ZIP code.              |
| race_black     | Numerical        | Percentage of Black individuals in the patient's ZIP code.              |
| race_asian     | Numerical        | Percentage of Asian individuals in the patient's ZIP code.              |
| race_native    | Numerical        | Percentage of Native American individuals in the patient's ZIP code.    |
| race_pacific   | Numerical        | Percentage of Pacific Islander individuals in the patient's ZIP code.   |
| hispanic       | Numerical        | Percentage of Hispanic individuals in the patient's ZIP code.           |
| payment_code   | Categorical<br>1 | Type of payment used for prescriptions (e.g., Medicare, Worker's Comp). |
| patient_gender | Categorical<br>1 | Gender of the patient (e.g., Male, Female, Other).                      |

### **IQVIA dataset**

|                             |           |                                                                                            |
|-----------------------------|-----------|--------------------------------------------------------------------------------------------|
| MMEs_under_two_years        | Numerical | Total morphine milligram equivalents (MME) prescribed in the last two years.               |
| MMEs_under_one_year         | Numerical | Total MME prescribed in the last year.                                                     |
| MMEs_over_one_year          | Numerical | Total MME prescribed more than one year ago.                                               |
| daily_mme_count_above_120   | Numerical | Number of days with daily MME exceeding 120.                                               |
| prescribers_under_two_years | Numerical | Number of prescribers visited in the past two years.                                       |
| prescribers_under_half_year | Numerical | Number of prescribers visited in the past 6 months.                                        |
| patient_age                 | Numerical | Age of the patient.                                                                        |
| age_median                  | Numerical | Median age of residents in the patient's ZIP code.                                         |
| income_household_median     | Numerical | Median household income in the patient's ZIP code.                                         |
| home_ownership              | Numerical | Percentage of homeowners in the patient's ZIP code.                                        |
| education_highschool        | Numerical | Percentage of individuals with at least a high school education in the patient's ZIP code. |
| education_college_or_above  | Numerical | Percentage of individuals with a college degree or higher in the patient's ZIP code.       |
| unemployment_rate           | Numerical | Unemployment rate in the patient's ZIP code.                                               |
| poverty                     | Numerical | Percentage of individuals below the poverty line in the patient's ZIP code.                |
| disabled                    | Numerical | Percentage of disabled individuals in the patient's ZIP code.                              |
| race_white                  | Numerical | Percentage of White individuals in the patient's ZIP code.                                 |
| race_black                  | Numerical | Percentage of Black individuals in the patient's ZIP code.                                 |
| race_asian                  | Numerical | Percentage of Asian individuals in the patient's ZIP code.                                 |
| race_native                 | Numerical | Percentage of Native American individuals in the patient's ZIP code.                       |
| race_pacific                | Numerical | Percentage of Pacific Islander individuals in the patient's ZIP code.                      |

|                |             |                                                                         |
|----------------|-------------|-------------------------------------------------------------------------|
| hispanic       | Numerical   | Percentage of Hispanic individuals in the patient's ZIP code.           |
| payment_code   | Categorical | Type of payment used for prescriptions (e.g., Medicare, Worker's Comp). |
| patient_gender | Categorical | Gender of the patient (e.g., Male, Female, Other).                      |

**Supplementary Table 2. Descriptive Characteristics of the CURES and IQVIA Datasets for Training, Validation, and Testing Cohorts**

| Dataset | Variables   | Measurements  | Training & Validation                                                                 | Testing                                                                             |
|---------|-------------|---------------|---------------------------------------------------------------------------------------|-------------------------------------------------------------------------------------|
| CURES   | Sample size | Number        | Training<br>17,875,136<br>Validation 8,937,568                                        | 6,703,177                                                                           |
|         | Age         | Mean $\pm$ SD | MOUD (n = 207,853): $44.71 \pm 15.57$<br>Non-MOUD (n = 26,604,851): $47.05 \pm 19.41$ | MOUD (n = 51,874): $44.70 \pm 15.54$<br>Non-MOUD (n = 6,651,303): $47.03 \pm 19.41$ |
|         | Sex         | Male          | MOUD: 41.89%                                                                          | MOUD: 41.88%                                                                        |
|         |             |               | Non-MOUD: 43.09%                                                                      | Non-MOUD: 43.10%                                                                    |
|         |             | Female        | MOUD: 57.92%                                                                          | MOUD: 57.90%                                                                        |
|         |             |               | Non-MOUD: 56.81%                                                                      | Non-MOUD: 56.81%                                                                    |
| IQVIA   | Sample size | Number        | Training: 1,034,485<br>Validation: 256,122                                            | 322,652                                                                             |
|         | Age         | Mean $\pm$ SD | ORAE (n = 133,644): $50.76 \pm 18.16$<br>Non-ORAE (n = 1,156,963): $41.26 \pm 17.01$  | ORAE (n = 33,411): $50.80 \pm 18.11$<br>Non-ORAE (n = 289,241): $41.26 \pm 17.02$   |
|         | Sex         | Male          | ORAE: 46.73%                                                                          | ORAE: 46.92%                                                                        |
|         |             |               | Non-ORAE: 43.95%                                                                      | Non-ORAE: 44.01%                                                                    |
|         |             | Female        | ORAE: 53.27%                                                                          | ORAE: 53.08%                                                                        |
|         |             |               | Non-ORAE: 56.05%                                                                      | Non-ORAE: 55.99%                                                                    |

**Supplementary Table 3. Comparative Performance of Predictive Models for Opioid-Related Outcomes Using prescription drug Monitoring Program (PDMP) and Claims Data**

| Dataset (features) | Model Type | Precision | Recall | Specificity | NPV | F1 Score |
|--------------------|------------|-----------|--------|-------------|-----|----------|
|--------------------|------------|-----------|--------|-------------|-----|----------|

|                                                               |                                                 |      |      |      |      |      |
|---------------------------------------------------------------|-------------------------------------------------|------|------|------|------|------|
| Baseline (NarxCare® predictive features <sup>a</sup> )        | Logistic Regression (Unknown model)             | 0.75 | 0.57 | 0.81 | 0.66 | 0.65 |
| PDMP (NarxCare® predictive features <sup>b</sup> )            | Logistic Regression (Majority Vote, 10 models)  | 0.02 | 0.60 | 0.71 | 1.00 | 0.03 |
| PDMP (NarxCare® predictive features <sup>b</sup> )            | Logistic Regression (Majority Vote, 20 models)  | 0.02 | 0.60 | 0.72 | 1.00 | 0.03 |
| PDMP (NarxCare® predictive features <sup>b</sup> )            | Logistic Regression (Majority Vote, 100 models) | 0.02 | 0.60 | 0.72 | 1.00 | 0.03 |
| PDMP (NarxCare® predictive features and SDoH <sup>b,c</sup> ) | Logistic Regression (Majority Vote, 10 models)  | 0.01 | 0.78 | 0.54 | 1.00 | 0.03 |
| PDMP (NarxCare® predictive features and SDoH <sup>b,c</sup> ) | Logistic Regression (Majority Vote, 20 models)  | 0.01 | 0.78 | 0.54 | 1.00 | 0.03 |
| PDMP (NarxCare® predictive features and SDoH <sup>b,c</sup> ) | Logistic Regression (Majority Vote, 100 models) | 0.01 | 0.78 | 0.54 | 1.00 | 0.03 |
| PDMP (NarxCare® predictive features and SDoH <sup>b,c</sup> ) | Logistic Regression (Majority Vote, 100 models) | 0.01 | 0.78 | 0.54 | 1.00 | 0.03 |
| PDMP (NarxCare® predictive features and SDoH <sup>b,c</sup> ) | Random Forest (Majority Vote, 10 models)        | 0.01 | 0.92 | 0.33 | 1.00 | 0.02 |
| PDMP (NarxCare® predictive features and SDoH <sup>b,c</sup> ) | Logistic Regression (RUS, 1 model)              | 0.02 | 0.63 | 0.72 | 1.00 | 0.03 |
| PDMP (NarxCare® predictive features and SDoH <sup>b,c</sup> ) | Logistic Regression (ENN + RUS, 1 model)        | 0.05 | 0.25 | 0.96 | 0.99 | 0.08 |
| PDMP (NarxCare® predictive features and SDoH <sup>b,c</sup> ) | XGBoost (RUS, 1 model)                          | 0.02 | 0.58 | 0.78 | 1.00 | 0.04 |
| PDMP (NarxCare® predictive features and SDoH <sup>b,c</sup> ) | XGBoost (ENN + SMOTE, 1 model)                  | 0.06 | 0.09 | 0.99 | 0.99 | 0.07 |
| PDMP (NarxCare® predictive features and SDoH <sup>b,c</sup> ) | Neural Network (1 model)                        | 0.01 | 0.20 | 0.99 | 0.99 | 0.02 |

|                                                             |                                                 |      |      |      |      |      |
|-------------------------------------------------------------|-------------------------------------------------|------|------|------|------|------|
| IQVIA (NarxCare® predictive features <sup>d</sup> )         | Logistic Regression (Majority Vote, 10 models)  | 0.20 | 0.55 | 0.75 | 0.94 | 0.30 |
| IQVIA (NarxCare® predictive features <sup>d</sup> )         | Logistic Regression (Majority Vote, 20 models)  | 0.20 | 0.55 | 0.75 | 0.94 | 0.30 |
| IQVIA (NarxCare® predictive features <sup>d</sup> )         | Logistic Regression (Majority Vote, 100 models) | 0.20 | 0.55 | 0.75 | 0.94 | 0.30 |
| IQVIA(NarxCare® predictive features and SDoH <sup>d</sup> ) | Logistic Regression (Majority Vote, 10 models)  | 0.20 | 0.55 | 0.75 | 0.94 | 0.30 |
| IQVIA(NarxCare® predictive features and SDoH <sup>d</sup> ) | Logistic Regression (Majority Vote, 20 models)  | 0.20 | 0.55 | 0.75 | 0.94 | 0.30 |
| IQVIA(NarxCare® predictive features and SDoH <sup>d</sup> ) | Logistic Regression (Majority Vote, 100 models) | 0.20 | 0.55 | 0.75 | 0.94 | 0.30 |
| IQVIA(NarxCare® predictive features and SDoH <sup>d</sup> ) | Logistic Regression (Majority Vote, 100 models) | 0.20 | 0.55 | 0.75 | 0.94 | 0.30 |
| IQVIA(NarxCare® predictive features and SDoH <sup>d</sup> ) | Random Forest (Majority Vote, 10 models)        | 0.22 | 0.56 | 0.77 | 0.94 | 0.31 |
| IQVIA(NarxCare® predictive features and SDoH <sup>d</sup> ) | Logistic Regression (RUS, 1 model)              | 0.20 | 0.55 | 0.75 | 0.94 | 0.30 |
| IQVIA(NarxCare® predictive features and SDoH <sup>d</sup> ) | Logistic Regression (ENN + RUS, 1 model)        | 0.20 | 0.58 | 0.73 | 0.94 | 0.29 |
| IQVIA(NarxCare® predictive features and SDoH <sup>d</sup> ) | XGBoost (RUS, 1 model)                          | 0.20 | 0.60 | 0.73 | 0.94 | 0.30 |
| IQVIA(NarxCare® predictive features and SDoH <sup>d</sup> ) | XGBoost (ENN + RUS, 1 model)                    | 0.20 | 0.81 | 0.72 | 0.94 | 0.30 |
| IQVIA(NarxCare® predictive features and SDoH <sup>d</sup> ) | XGBoost (ENN + SMOTE, 1 model)                  | 0.28 | 0.17 | 0.95 | 0.91 | 0.21 |

|                                                             |                                                                                                                                |      |      |      |      |      |
|-------------------------------------------------------------|--------------------------------------------------------------------------------------------------------------------------------|------|------|------|------|------|
| IQVIA(NarxCare® predictive features and SDoH <sup>d</sup> ) | Neural Network (1 model, NN w/ 1 fully connected layer, Learning Rate = 0.01 (100 epochs))                                     | 0.20 | 0.54 | 0.76 | 0.93 | 0.30 |
| IQVIA(NarxCare® predictive features and SDoH <sup>d</sup> ) | Neural Network (1 model, NN w/ 1 fully connected layer, Learning Rate = 0.001 (100 epochs))                                    | 0.20 | 0.56 | 0.74 | 0.94 | 0.29 |
| IQVIA(NarxCare® predictive features and SDoH <sup>d</sup> ) | Neural Network (1 model, NN w/ 1 fully connected layer, Learning Rate = 0.001 (200 epochs))                                    | 0.20 | 0.56 | 0.74 | 0.94 | 0.29 |
| IQVIA(NarxCare® predictive features and SDoH <sup>d</sup> ) | Neural Network (1 model, NN w/ 3 fully connected layer)                                                                        | 0.21 | 0.50 | 0.78 | 0.93 | 0.30 |
| IQVIA(NarxCare® predictive features and SDoH <sup>d</sup> ) | Neural Network (1 model, Simple feedforward: NN w/ 4 fully connected layers, batch normalization, regularization, and dropout) | 0.27 | 0.55 | 0.80 | 0.94 | 0.36 |
| IQVIA(NarxCare® predictive features and SDoH <sup>d</sup> ) | Neural Network (custom architecture, Wide & Deep NN: Simple Feedforward NN w/ a parallel and additional flow)                  | 0.26 | 0.58 | 0.78 | 0.94 | 0.36 |
| IQVIA(NarxCare® predictive features and SDoH <sup>d</sup> ) | Neural Network (multi-head attention)                                                                                          | 0.32 | 0.49 | 0.86 | 0.94 | 0.39 |
| IQVIA(NarxCare® predictive features and SDoH <sup>d</sup> ) | Neural Network (focal loss, Utilize a focal loss instead of common binary cross-entropy loss.)                                 | 0.26 | 0.37 | 0.88 | 0.92 | 0.31 |
| IQVIA(NarxCare® predictive features and SDoH <sup>d</sup> ) | Neural Network (SMOTE, Use SMOTE to generate minority synthetic data.)                                                         | 0.24 | 0.47 | 0.83 | 0.93 | 0.32 |
| IQVIA(NarxCare® predictive features and SDoH <sup>d</sup> ) | Neural Network (ensemble vote, Use three submodels to vote.)                                                                   | 0.29 | 0.38 | 0.89 | 0.93 | 0.33 |
| IQVIA(NarxCare® predictive features and SDoH <sup>d</sup> ) | Neural Network (1 model, BiGAN)                                                                                                | 0.25 | 0.41 | 0.89 | 0.93 | 0.31 |

---

Abbreviation: SDoH: Social Determinants of Health; RUS: Random Undersampling; ENN: Edited Nearest Neighbors; SMOTE: Synthetic Minority Oversampling Technique;

XGBoost: Extreme Gradient Boosting; IQVIA: Refers to a commercial data source (IQVIA™); F1 Score: Harmonic mean of precision and recallNPV: Negative Predictive Value

<sup>a</sup> NarxCare® predictive features include cumulative morphine milligram equivalents (MME) over the past 365 days and 2 years; total MME dosage in the past 2 years and  $\geq 1$  year prior to the index date; the number of prescriptions with daily MME >120; and counts of unique pharmacies and prescribers over 2 years and the past 180 days.

<sup>b</sup> The PDMP-based models use receipt of medication for opioid use disorder (MOUD) as a proxy outcome for identifying individuals with opioid use disorder.

<sup>c</sup> Social determinants of health (SDoH) include individual-level variables (e.g., age, gender, and payment type) and neighborhood-level characteristics such as median age, socioeconomic status, housing, education, employment, disability, and racial/ethnic composition.

<sup>d</sup> The IQVIA-based models use opioid-related adverse events identified through International Classification of Diseases (ICD) codes<sup>4</sup> as the outcome.
